# Supplementary material
Source: PubMed Central journal article supplement (PMC7125538)
Supplement: mmc2.pdf [file mmc2.pdf]

**Table S2. Summary of long-term storage test in this study**

| Lineage               | Clade                        | Strain                        | Storage period at 4°C (month) |         |                |                            |         |                |
|-----------------------|------------------------------|-------------------------------|-------------------------------|---------|----------------|----------------------------|---------|----------------|
|                       |                              |                               | 0                             |         |                | 12                         |         |                |
|                       |                              |                               | Reactivity (HAU threshold)    |         | Identification | Reactivity (HAU threshold) |         | Identification |
| $\alpha$ 2,3Sia strip | $\alpha$ 2,6Sia strip        | $\alpha$ 2,3Sia strip         | $\alpha$ 2,6Sia strip         |         |                |                            |         |                |
| Group 1               | H1N1                         | A/Suita/117/2011              | –                             | + (32)  | Human          | –                          | + (32)  | Human          |
|                       | H5N1                         | A/duck/Egypt/D1Br/2007 (EG/D1 | + (32)                        | –       | Bird           | + (32)                     | –       | Bird           |
|                       |                              | rEG/D1                        | + (32)                        | –       | Bird           | + (32)                     | –       | Bird           |
|                       |                              | rEG/D1 <sub>Q192H</sub>       | + (32)                        | + (128) | Dual           | + (32)                     | + (128) | Dual           |
|                       | rEG/D1 <sub>128Δ/1151T</sub> | + (32)                        | + (128)                       | Dual    | + (32)         | + (128)                    | Dual    |                |
| Group 2               | H3N2                         | A/Japan/434/2003              | –                             | –       | un             | –                          | –       | un             |

Abbreviations: +, positive result; –, negative result; Human, Human-type receptor specificity; Bird, Bird-type receptor specificity; Dual, Dual receptor affinity; un, unknown.

Same batch of test strips were used to evaluate the stability and reproductivity of the strip test.

HAU threshold is the lowest HAU titer at which positive result was detected in the strip test.
